# Supplementary material for: ASCC1 structures and bioinformatics reveal a novel helix-clasp-helix RNA-binding motif linked to a two-histidine phosphodiesterase
Source: PubMed Central journal article supplement — J Biol Chem. 2024 May 14;300(6):107368. doi: 10.1016/j.jbc.2024.107368 (PMC11214414; doi:10.1016/j.jbc.2024.107368), 2024-05-14
Supplement: mmc1.pdf [file mmc1.pdf]

## **SUPPORTING INFORMATION**

### **ASCC1 structures and bioinformatics reveal a novel Helix-Clasp-Helix RNA-binding motif linked to a two-histidine phosphodiesterase**

Naga babu Chinnam, Roopa Thapar, Andrew S. Arvai, Altaf H. Sarker, Jennifer Soll, Tanmoy Paul, Aleem Syed, Daniel J. Rosenberg, Michal Hammel, Albino Bacolla, Panagiotis Katsonis, Abhishek Asthana, Miaw-Sheue Tsai, Ivaylo Ivanov, Olivier Lichtarge, Robert H. Silverman, Nima Mosammaparast, Susan E. Tsutakawa, John A. Tainer

## ASCC1 Supplemental Table S1

### *ASCC1 germline mutations and phenotypes*

| <i>Mutation<br/>cDNA (Protein)</i>                            | <i>No cases</i> | <i>Phenotype</i>                                     | <i>PMID</i> |
|---------------------------------------------------------------|-----------------|------------------------------------------------------|-------------|
| c.157dupG (p.Glu53Glyfs19*) H                                 | 2               | SMA and congenital bone fractures                    | 26924529    |
| c.157dupG (p.Glu53Glyfs19*) H                                 | 1               | SMA and congenital bone fractures                    | 28218388    |
| c.710+1G>A (splicing, +1 FS) H                                | 1               | Fetal akinesia & intrauterine fetal death            | 28749478    |
| c.871+1G>A splicing, +1 FS) H                                 | 1               | Hydrops fetalis                                      | 28749478    |
| c.157dupG (p.Glu53Glyfs19*) H                                 | 2               | Muscle weakness with arthrogryposis & bone fractures | 30327447    |
| c.157dupG (p.Glu53Glyfs19*)<br>and<br>c.466C>T (p.Arg156*) CH | 1               | Muscle weakness with arthrogryposis & bone fractures | 30327447    |
| c.412C>T (p.Arg138*) H                                        | 3               | Muscle weakness with arthrogryposis & bone fractures | 30327447    |
| 64kb CNV - exons 7-10del<br>and<br>c.1027C>T (p.Arg343*) CH   | 1               | SMABF2                                               | 31880396    |
| Exon 5del<br>and<br>c.932C>G (p.Ser311*) CH                   | 1               | SMABF2                                               | 32160656    |
| c.466C>T (p.Arg156*)<br>and<br>c.297-8T>G CH                  | 1               | SMABF2                                               | 33931933    |
| c.626+1G>A (splicing) H                                       | 2               | SMABF2                                               | 35338657    |
| c.710+1G>A (p.Asp192*) H                                      | 1               | SMABF2                                               | 35690317    |
| c.897G>A (p.Trp299*) H                                        | 1               | SMABF2                                               | 35690317    |
| N290S                                                         | 2               | Barrett oesophagus/oesophageal adenocarcinoma        | 21791690    |

#### **Supplemental Table S1.** ASCC1 germline mutations and phenotypes

Mutations were taken from the original articles, which may have used different transcript versions. *SMA*, spinal muscular atrophy; *SMABF2*, spinal muscular atrophy with congenital bone fractures 2.

## ASCC1 Supplemental Table S2

**Supplemental Table S2.** Kaplan-Meier analysis of TCGA patients expressing various levels of ASCC1 mRNA.

For each tumor type patients were divided in 3 groups, g\_low expressing ASCC1 levels below mean-1SD, g\_high expressing ASCC1 levels above mean+1SD and g\_medium expressing ASCC1 levels between mean-1SD and mean+1SD. P-values were derived from log-rank tests and corrected with Holm-Sidak method for pairwise comparisons. Highlighted values show significant P-values lower than 0.05.

**See excel Table S2**

## ASCC1 Supplemental Table S3

| ASCC1                      |     |         |          | ZNF652   |                             |     |         |          |          |
|----------------------------|-----|---------|----------|----------|-----------------------------|-----|---------|----------|----------|
| dataset                    | N   | mean    | SD       | p-value  | dataset                     | N   | mean    | SD       | p-value  |
| ascc1_blca_patLow_mut_f1   | 192 | 2.4084  | 0.376135 |          | znf652_blca_patLow_mut_f1   | 181 | 2.3429  | 0.406115 |          |
| ascc1_blca_patHigh_mut_f1  | 217 | 2.32541 | 0.364449 | 2.44E-02 | znf652_blca_patHigh_mut_f1  | 228 | 2.38141 | 0.342167 | 3.08E-01 |
| ascc1_brca_patLow_mut_f1   | 556 | 1.77152 | 0.39329  |          | znf652_brca_patLow_mut_f1   | 543 | 1.8112  | 0.362993 |          |
| ascc1_brca_patHigh_mut_f1  | 521 | 1.81698 | 0.336817 | 4.15E-02 | znf652_brca_patHigh_mut_f1  | 534 | 1.77553 | 0.371687 | 1.12E-01 |
| ascc1_cesc_patLow_mut_f1   | 142 | 2.09357 | 0.451023 |          | znf652_cesc_patLow_mut_f1   | 147 | 2.05387 | 0.451572 |          |
| ascc1_cesc_patHigh_mut_f1  | 157 | 2.06295 | 0.444509 | 5.55E-01 | znf652_cesc_patHigh_mut_f1  | 152 | 2.10033 | 0.443069 | 3.70E-01 |
| ascc1_coad_patLow_mut_f1   | 151 | 2.432   | 0.507098 |          | znf652_coad_patLow_mut_f1   | 133 | 2.32515 | 0.513128 |          |
| ascc1_coad_patHigh_mut_f1  | 134 | 2.32322 | 0.490714 | 6.70E-02 | znf652_coad_patHigh_mut_f1  | 151 | 2.43112 | 0.488915 | 7.69E-02 |
| ascc1_dlbcl_patLow_mut_f1  | 17  | 1.83681 | 0.427772 |          | znf652_dlbcl_patLow_mut_f1  | 17  | 1.9316  | 0.505366 |          |
| ascc1_dlbcl_patHigh_mut_f1 | 20  | 2.05722 | 0.432315 | 1.29E-01 | znf652_dlbcl_patHigh_mut_f1 | 20  | 1.97664 | 0.385276 | 7.66E-01 |
| ascc1_gbm_patLow_mut_f1    | 126 | 1.81366 | 0.186422 |          | znf652_gbm_patLow_mut_f1    | 103 | 1.78211 | 0.321027 |          |
| ascc1_gbm_patHigh_mut_f1   | 112 | 1.75485 | 0.352909 | 1.16E-01 | znf652_gbm_patHigh_mut_f1   | 136 | 1.79437 | 0.237379 | 7.45E-01 |
| ascc1_hnsc_patLow_mut_f1   | 260 | 2.1163  | 0.333272 |          | znf652_hnsc_patLow_mut_f1   | 259 | 2.10615 | 0.328231 |          |
| ascc1_hnsc_patHigh_mut_f1  | 241 | 2.14586 | 0.337201 | 3.25E-01 | znf652_hnsc_patHigh_mut_f1  | 242 | 2.15661 | 0.341167 | 9.26E-02 |
| ascc1_kich_patLow_mut_f1   | 33  | 1.21741 | 0.351535 |          | znf652_kich_patLow_mut_f1   | 34  | 1.08788 | 0.27524  |          |
| ascc1_kich_patHigh_mut_f1  | 32  | 1.083   | 0.285058 | 9.51E-02 | znf652_kich_patHigh_mut_f1  | 31  | 1.22073 | 0.36427  | 1.05E-01 |
| ascc1_kirc_patLow_mut_f1   | 222 | 1.84695 | 0.255667 |          | znf652_kirc_patLow_mut_f1   | 218 | 1.8669  | 0.26008  |          |
| ascc1_kirc_patHigh_mut_f1  | 268 | 1.84549 | 0.228622 | 9.47E-01 | znf652_kirc_patHigh_mut_f1  | 270 | 1.83082 | 0.223438 | 1.06E-01 |
| ascc1_kirp_patLow_mut_f1   | 124 | 1.85637 | 0.244743 |          | znf652_kirp_patLow_mut_f1   | 129 | 1.86758 | 0.251976 |          |
| ascc1_kirp_patHigh_mut_f1  | 151 | 1.89094 | 0.287787 | 2.83E-01 | znf652_kirp_patHigh_mut_f1  | 146 | 1.88222 | 0.284429 | 6.51E-01 |
| ascc1_laml_patLow_mut_f1   | 85  | 1.24111 | 0.36883  |          | znf652_laml_patLow_mut_f1   | 78  | 1.25155 | 0.413246 |          |
| ascc1_laml_patHigh_mut_f1  | 84  | 1.30022 | 0.514887 | 3.93E-01 | znf652_laml_patHigh_mut_f1  | 91  | 1.28672 | 0.475829 | 6.08E-01 |
| ascc1_lgg_patLow_mut_f1    | 216 | 1.5796  | 0.326751 |          | znf652_lgg_patLow_mut_f1    | 257 | 1.55068 | 0.311016 |          |
| ascc1_lgg_patHigh_mut_f1   | 319 | 1.53852 | 0.238131 | 1.14E-01 | znf652_lgg_patHigh_mut_f1   | 272 | 1.55754 | 0.240459 | 7.78E-01 |
| ascc1_lihc_patLow_mut_f1   | 188 | 2.03258 | 0.235417 |          | znf652_lihc_patLow_mut_f1   | 195 | 2.01768 | 0.298734 |          |
| ascc1_lihc_patHigh_mut_f1  | 181 | 2.02829 | 0.305588 | 8.80E-01 | znf652_lihc_patHigh_mut_f1  | 174 | 2.04481 | 0.237933 | 3.33E-01 |
| ascc1_luad_patLow_mut_f1   | 280 | 2.29025 | 0.509699 |          | znf652_luad_patLow_mut_f1   | 230 | 2.32018 | 0.478214 |          |
| ascc1_luad_patHigh_mut_f1  | 236 | 2.41622 | 0.399014 | 1.75E-03 | znf652_luad_patHigh_mut_f1  | 286 | 2.36765 | 0.454107 | 2.52E-01 |
| ascc1_lusc_patLow_mut_f1   | 260 | 2.36634 | 0.400437 |          | znf652_lusc_patLow_mut_f1   | 228 | 2.41985 | 0.448865 |          |
| ascc1_lusc_patHigh_mut_f1  | 230 | 2.44738 | 0.436356 | 3.35E-02 | znf652_lusc_patHigh_mut_f1  | 261 | 2.3912  | 0.392681 | 4.56E-01 |
| ascc1_ov_patLow_mut_f1     | 128 | 1.84896 | 0.333557 |          | znf652_ov_patLow_mut_f1     | 136 | 1.85747 | 0.35735  |          |
| ascc1_ov_patHigh_mut_f1    | 145 | 1.84984 | 0.35194  | 9.83E-01 | znf652_ov_patHigh_mut_f1    | 136 | 1.84321 | 0.329439 | 7.32E-01 |
| ascc1_paad_patLow_mut_f1   | 87  | 1.57315 | 0.363197 |          | znf652_paad_patLow_mut_f1   | 85  | 1.68256 | 0.215006 |          |
| ascc1_paad_patHigh_mut_f1  | 83  | 1.5314  | 0.432578 | 4.98E-01 | znf652_paad_patHigh_mut_f1  | 85  | 1.42298 | 0.488145 | 1.72E-05 |
| ascc1_prad_patLow_mut_f1   | 271 | 1.61054 | 0.262731 |          | znf652_prad_patLow_mut_f1   | 267 | 1.55763 | 0.303817 |          |
| ascc1_prad_patHigh_mut_f1  | 226 | 1.60978 | 0.35076  | 9.79E-01 | znf652_prad_patHigh_mut_f1  | 230 | 1.67121 | 0.296802 | 3.08E-05 |
| ascc1_read_patLow_mut_f1   | 44  | 2.26098 | 0.3811   |          | znf652_read_patLow_mut_f1   | 45  | 2.20698 | 0.324957 |          |
| ascc1_read_patHigh_mut_f1  | 47  | 2.18681 | 0.275281 | 2.93E-01 | znf652_read_patHigh_mut_f1  | 48  | 2.22538 | 0.338108 | 7.90E-01 |
| ascc1_sarc_patLow_mut_f1   | 121 | 1.70119 | 0.490081 |          | znf652_sarc_patLow_mut_f1   | 117 | 1.7458  | 0.454256 |          |
| ascc1_sarc_patHigh_mut_f1  | 117 | 1.56548 | 0.407792 | 2.09E-02 | znf652_sarc_patHigh_mut_f1  | 121 | 1.52683 | 0.432229 | 1.79E-04 |
| ascc1_skcm_patLow_mut_f1   | 50  | 2.42776 | 0.615879 |          | znf652_skcm_patLow_mut_f1   | 43  | 2.44586 | 0.588983 |          |
| ascc1_skcm_patHigh_mut_f1  | 54  | 2.56046 | 0.512794 | 2.37E-01 | znf652_skcm_patHigh_mut_f1  | 61  | 2.53248 | 0.551073 | 4.50E-01 |
| ascc1_stad_patLow_mut_f1   | 212 | 2.31044 | 0.543314 |          | znf652_stad_patLow_mut_f1   | 191 | 2.30464 | 0.438264 |          |
| ascc1_stad_patHigh_mut_f1  | 200 | 2.21167 | 0.5027   | 5.60E-02 | znf652_stad_patHigh_mut_f1  | 221 | 2.22606 | 0.589495 | 1.23E-01 |
| ascc1_thca_patLow_mut_f1   | 203 | 1.20404 | 0.313955 |          | znf652_thca_patLow_mut_f1   | 276 | 1.23004 | 0.301759 |          |
| ascc1_thca_patHigh_mut_f1  | 294 | 1.2398  | 0.291434 | 2.00E-01 | znf652_thca_patHigh_mut_f1  | 221 | 1.21914 | 0.300714 | 6.89E-01 |
| ascc1_ucec_patLow_mut_f1   | 82  | 2.36626 | 0.649737 |          | znf652_ucec_patLow_mut_f1   | 69  | 2.14741 | 0.574131 |          |
| ascc1_ucec_patHigh_mut_f1  | 83  | 2.09564 | 0.568822 | 5.02E-03 | znf652_ucec_patHigh_mut_f1  | 96  | 2.28959 | 0.653102 | 1.41E-01 |

**Supplemental Table S3.** For ASCC1 and ZNF652 we separated cancer patients into a higher (m\_high, or patHigh) and lower expression (m\_low or patLow) group for the respective gene based on RNA-seq data, approximately similar in population size as determined by the mean value. The dataset name is defined by the gene (ASCC1 or ZNF652), the TCGA cancer type, and the expression level (low vs. high).

We then compared the distribution of the log10 of the number of mutations that occurred for the low or high expression groups of the respective gene. The p-value from Student t-test is given for the significance of the difference.

## ASCC1 Supplemental Table S4

**Supplemental Table S4.** Mutation loads in TCGA tumor samples expressing various levels of ASCC1 mRNA.

For each tumor type patients were divided in 3 groups, g\_low (patLow) expressing ASCC1 levels below mean-1SD, g\_high (patHigh) expressing ASCC1 levels above mean+1SD and g\_medium (patMedium) expressing ASCC1 levels between mean-1SD and mean+1SD. For each tumor sample, the number of simple mutations exome-wide was obtained from COSMIC by intersecting TCGA patient codes with COSMIC patient codes and reported as a log10 transform. P-values were derived from pairwise t-tests. *Yellow highlights*, significant differences. *Most muts*, group with the higher mutational load.

**See excel Table S4**

## ASCC1 Supplemental Table S5

**Supplemental Table S5.** Signature mutations in TCGA tumor samples expressing various levels of ASCC1 mRNA – 2 groups.

For each tumor type samples were divided in 2 groups, m\_low expressing ASCC1 levels below the population mean, and m\_high expressing ASCC1 levels above the population mean.

For each of the 30 mutational signatures ([https://cancer.sanger.ac.uk/signatures/signatures\\_v2/](https://cancer.sanger.ac.uk/signatures/signatures_v2/)) and for each of the 2 groups the number of samples containing mutations conforming to a given signature was recorded and compared using Fisher's tests. *Highlights*, significant p-values.

**See excel Table S5**

## ASCC1 Supplemental Table S6

**Supplemental Table S6.** Signature mutations in TCGA tumor samples expressing various levels of ASCC1 mRNA- 3 groups.

For each tumor type patients were divided in 3 groups, g\_low (patLow) expressing ASCC1 levels below mean-1SD, g\_high (patHigh) expressing ASCC1 levels above mean+1SD and g\_medium (patMedium) expressing ASCC1 levels between mean-1SD and mean+1SD.

For each of the 30 mutational signatures ([https://cancer.sanger.ac.uk/signatures/signatures\\_v2/](https://cancer.sanger.ac.uk/signatures/signatures_v2/)) and for each of the 3 groups the number of samples containing mutations conforming to a given signature was recorded and compared using Fisher's tests.

**See excel Table S6**

## ASCC1 Supplemental Table S7

|                                                               |                                                                                                                                                                                                                                                                                                                                                                                                     |
|---------------------------------------------------------------|-----------------------------------------------------------------------------------------------------------------------------------------------------------------------------------------------------------------------------------------------------------------------------------------------------------------------------------------------------------------------------------------------------|
| ApASCC1 full-length (SAXS)                                    | SNAMDILRPPICIDGFRFRNPVQDKSPREYEEEFVGTGVSERVYRDDICDTLGEQIQETENGYKLELEIPSAY<br>YKYIIGKKGETKKRLENETRTLKIPGHGREGSVVISGHDRQGILSAKTRLDLLIESARRRQPFTHFISIPVNSQPI<br>QDKFIEFKDDVVRFCSDRGVDDTIFQNPVKLHLLTIGTMPLLDKSEIDKAKAVLQQCKEELIAYDYIGHGGIT<br>CQLRGLEYMNDPGEVDVLYAKIQLQDNDRLQCLADQLVNGFCESGLMNREHDRVKLHVTVMNTLMR<br>KDPTGAGVTVSSGNKKPIKDRESFDANNILKLYGDYDFGPYQINTIHLSQRYSTSQDGYACEDKIDF                 |
| ApASCC1 full-length with His Tag (Biochemical assay)          | MHHHHHHENLYFQSNAMDILRPPICIDGFRFRNPVQDKSPREYEEEFVGTGVSERVYRDDICDTLGEQIQ<br>ETENGYKLELEIPSAYKYIIGKKGETKKRLENETRTLKIPGHGREGSVVISGHDRQGILSAKTRLDLLIESARRR<br>QPFTHFISIPVNSQPIQDKFIEFKDDVVRFCSDRGVDDTIFQNPVKLHLLTIGTMPLLDKSEIDKAKAVLQQC<br>KEELIAYDYIGHGGITCQLRGLEYMNDPGEVDVLYAKIQLQDNDRLQCLADQLVNGFCESGLMNREHD<br>RVKLHVTVMNTLMRKDPTGAGVTVSSGNKKPIKDRESFDANNILKLYGDYDFGPYQINTIHLSQRYSTSQD<br>GYACEDKIDF |
| ApASCC1Δ40 (crystallography and SAXS)                         | SNARVYRDDICDTLGEQIQETENGYKLELEIPSAYKYIIGKKGETKKRLENETRTLKIPGHGREGSVVISGH<br>RQGILSAKTRLDLLIESARRRQPFTHFISIPVNSQPIQDKFIEFKDDVVRFCSDRGVDDTIFQNPVKLHLLTIG<br>TMPLLDKSEIDKAKAVLQQCKEELIAYDYIGHGGITCQLRGLEYMNDPGEVDVLYAKIQLQDNDRLQCLA<br>DQLVNGFCESGLMNREHDRVKLHVTVMNTLMRKDPTGAGVTVSSGNKKPIKDRESFDANNILKLYGDYD<br>FGPYQINTIHLSQRYSTSQDGYACEDKIDF                                                         |
| HsASCC1 full-length with His Tag (SAXS and Biochemical assay) | MHHHHHHENLYFQSNAMEVLRPQLIRIDGRNRYKPNVQEQTQHEEDEEDFYQGSMECADEPCDAYEV<br>EQTPQGFRSTLRAPSLLYKHIVGKRGDTRKKIEMETKTSISIPKPGQDGEIVITGQHRNGVISARTRIDVLLDTF<br>RRKQPFTHFLLAFFLNEVEVQEGFLRFQEEVLAKCSMDHGVDSIFQNPVKLHLLTIGMLVLLSEEEIQTC<br>EMLQCKEELIAYDYIGHGGITCQLRGLEYMNDPGEVDVLYAKIQLQDNDRLQCLADQLVNGFCESGLMN<br>REHDRVKLHVTVMNTLMRKDPTGAGVTVSSGNKKPIKDRESFDANNILKLYGDYDFGPYQINTIHLSQ<br>RYSTSQDGYACEDKIDF  |
| HsASCC1Δ133 (crystallography)                                 | MGSSHHHHHSSGLVPRGSHMTHFLAFFLNEVEVQEGFLRFQEEVLAKCSMDHGVDSIFQNPVKLHLLT<br>I<br>GMLVLLSEEEIQTC<br>EMLQCKEELIAYDYIGHGGITCQLRGLEYMNDPGEVDVLYAKIQLQDNDRLQCLADQLVNGFCESGLMN<br>REHDRVKLHVTVMNTLMRKDPTGAGVTVSSGNKKPIKDRESFDANNILKLYGDYDFGPYQINTIHLSQ<br>RYSTSQDGYACEDKIDF                                                                                                                                   |

**Supplemental Table S7.** Amino acid sequences for ASCC1 proteins used in this paper.



## ASCC1 Supplemental Table S8

|                                       | <b>ApASCC1<math>\Delta</math>40</b> | <b>HsASCC1 <math>\Delta</math>133</b> |
|---------------------------------------|-------------------------------------|---------------------------------------|
| <b>PDB Code</b>                       | 8TUK                                | 8TLY                                  |
| <b>Wavelength</b>                     | 0.97946                             | 0.97946                               |
| <b>Resolution range</b>               | 35.87 - 1.15 (1.22 - 1.15)          | 35.73 - 2.8 (3.0 - 2.8)               |
| <b>Space group</b>                    | P 1 21 1                            | P 21 21 21                            |
| <b>Unit cell</b>                      | 35.88 51.60 81.93 90 91.44<br>90    | 57.88 62.11 136.22 90 90<br>90        |
| <b>Total reflections</b>              | 657320                              | 82297                                 |
| <b>Unique reflections</b>             | 101451 (13759)                      | 12679 (1990)                          |
| <b>Multiplicity</b>                   | 6.5 (5.0)                           | 6.5 (6.5)                             |
| <b>Completeness (%)</b>               | 95.7 (80.8)                         | 99.6 (99.6)                           |
| <b>Mean I/sigma(I)</b>                | 16.5 (2.0)                          | 9.7 (1.72)                            |
| <b>Wilson B-factor</b>                | 15.76                               | 44.11                                 |
| <b>R-meas</b>                         | 5.1 (70.1)                          | 18.9 (97.6)                           |
| <b>CC1/2</b>                          | 99.9 (82.9)                         | 99.2 (79.6)                           |
| <b>Reflections used in refinement</b> | 98954 (7189)                        | 12158 (1115)                          |
| <b>Reflections used for R-free</b>    | 1929 (141)                          | 599 (56)                              |
| <b>R-work</b>                         | 0.15 (0.25)                         | 0.21 (0.29)                           |
| <b>R-free</b>                         | 0.17 (0.27)                         | 0.26 (0.33)                           |
| <b>Number of non-hydrogen atoms</b>   | 2987                                | 3693                                  |
| <b>-macromolecule atoms</b>           | 2471                                | 3536                                  |
| <b>-ligand atoms</b>                  | 70                                  | 0                                     |
| <b>-solvent atoms</b>                 | 486                                 | 157                                   |
| <b>Protein residues</b>               | 290                                 | 437                                   |
| <b>RMS(bonds)</b>                     | 0.008                               | 0.002                                 |
| <b>RMS(angles)</b>                    | 0.87                                | 0.50                                  |
| <b>Ramachandran favored (%)</b>       | 97.2                                | 96.1                                  |
| <b>Ramachandran allowed (%)</b>       | 2.8                                 | 3.9                                   |
| <b>Ramachandran outliers (%)</b>      | 0.0                                 | 0.0                                   |
| <b>Rotamer outliers (%)</b>           | 0.4                                 | 0.0                                   |
| <b>Clashscore</b>                     | 4.0                                 | 3.9                                   |
| <b>Average B-factor (all)</b>         | 29.5                                | 43.8                                  |
| <b>-macromolecules only</b>           | 27.1                                | 43.8                                  |
| <b>-ligands only</b>                  | 38.2                                |                                       |
| <b>-solvent only</b>                  | 41.0                                | 43.9                                  |

**Supplemental Table S8.** Crystallographic statistics. Highest resolution shell is in parentheses.

## ASCC1 Supplemental Table S9

|     |                       |
|-----|-----------------------|
| RNA | uuuu <b>CACA</b> uuuu |
| RNA | uuuu <b>AACA</b> uuuu |
| RNA | uuuu <b>CGCA</b> uuuu |
| RNA | uuuu <b>AGCA</b> uuuu |
| RNA | uuuu <b>CACG</b> uuuu |
| RNA | uuuu <b>AACG</b> uuuu |
| RNA | uuuu <b>CGCG</b> uuuu |
| RNA | uuuu <b>AGCG</b> uuuu |
| DNA | tttt <b>CGCG</b> tttt |

**Supplemental Table S10.** RNA oligonucleotides used in this study.

## ASCC1 Supplemental Table S10

| SAXS Data                        | ApASCC1 $\Delta 40$  | ApASCC1 Full-length  | Hs ASCC1 Full-length |
|----------------------------------|----------------------|----------------------|----------------------|
| Simple Scattering Dataset #      | XSVL1FQL             | XSA5YQYE             | XSWQ5ILA             |
| Beamline                         | ALS SIBYLS<br>12.3.1 | ALS SIBYLS<br>12.3.1 | ALS SIBYLS<br>12.3.1 |
| Data Collection Mode             | MALS-SEC-SAXS        | MALS-SEC-SAXS        | MALS-SEC-SAXS        |
| SEC-SAXS Data reduction          | SCATTER              | RAW                  | SCATTER              |
| Porod Debye (Px)                 | 4.0                  | 4.0                  | 3.0                  |
| Low q ( $\text{\AA}^{-1}$ )      | 0.030                | 0.025                | 0.026                |
| High q ( $\text{\AA}^{-1}$ )     | 0.33                 | 0.36                 | 0.35                 |
| Reciprocal Rg ( $\text{\AA}$ )   | 25.33                | 30.7                 | 28.62                |
| Reciprocal I(0 (detector units)) | 18                   | 4336                 | 74.25                |
| Real space Rg ( $\text{\AA}$ )   | 25.85                | 32.33                | 30.18                |
| Real space I(0 (detector units)) | 18.21                | 4422                 | 75.73                |
| Dmax ( $\text{\AA}$ )            | 90.38                | 119.23               | 118.55               |
| Energy (keV)                     | 12                   | 12                   | 12                   |
| Temp ( $^{\circ}\text{C}$ )      | 20                   | 20                   | 20                   |
| SAXS MW (kD)                     | 35                   | 46                   | 44                   |
| MALS MW (kD)                     | 37.7                 | 49                   | 44.5                 |
| Theoretical MW(kD)               | 36.5                 | 41                   | 44                   |

Supplemental Table S9. SAXS details and statistics.

# ASCC1 Supplemental Table S11

| Human Iso1 | EA    | Human Iso2 | EA    | Alvi | EA     |
|------------|-------|------------|-------|------|--------|
| Q201K      | 99.87 | Q173       | 78.47 | Q176 | 78.69  |
| H207L      | 96.67 | H179       | 96.9  | H182 | 96.62  |
| C231G      | 94.74 | C203       | 91.98 | C206 | 92.85  |
| I345S      | 91.58 | I317       | 90.93 | I319 | 91.94  |
| G58R       | 91.16 | G58        | 87.78 | G61  | 88.31  |
| D283Y      | 90.46 | D255       | 91.67 | D259 | 83.72  |
| P259H      | 90.26 | P231       | 92.47 | P235 | 91.28  |
| C231S      | 88.99 | c203       | 84.15 | C206 | 86     |
| G106E      | 88.45 | G78        | 89.69 | G81  | 92.4   |
| R156Q      | 82.96 | R128       | 82.56 | R131 | 82.55  |
| G194W      | 82.06 | G166       | 79.3  | G169 | 75.25  |
| S67R       | 81.68 | S67        | 75.33 | S70  | 67.23  |
| E113K      | 81.55 | E85        | 82.7  | E88  | 83.77  |
| P203L      | 81.17 | P175       | 81.58 | P178 | 81.16  |
| H207Y      | 80.62 | H179       | 79.33 | H182 | 79.39  |
| H163Y      | 80.6  | H135       | 79.31 | H138 | 79.37  |
| K205N      | 72.67 | K177       | 68.79 | K180 | 68.96  |
| G211R      | 71.4  | G183       | 74.37 | G186 | 76.19  |
| F181L      | 69.63 | F153       | 67.46 | F156 | 66.2   |
| E298G      | 68.1  | E270       | 61.77 | E274 | 56.39  |
| C189Y      | 67.57 | C161       | 65.81 | C164 | 57.68  |
| L165V      | 63.36 | L137       | 65.79 | I140 | 44.63  |
| Y70C       | 60.94 | Y70        | 59.78 | Y73  | 59.76  |
| G241W      | 58.53 | G213       | 43.17 | G217 | 60.37  |
| D31G       | 53.99 | D31        | 33.34 | E31  | 54.27  |
| T134A      | 53.89 | T106       | 44.21 | S109 | 34.67  |
| M309I      | 53.81 | M281       | 46.51 | M285 | 51.17  |
| A267T      | 52.6  | A239       | 50.63 | A243 | 50.07  |
| T116S      | 50.68 | T88        | 39.86 | T91  | 40.71  |
| S67C       | 50.63 | S67C       | 46.59 | S70  | 42.54  |
| L169I      | 49.89 | L141       | 55.29 | V144 | 43.99  |
| V52M       | 49.55 | V52        | 51.74 | I55  | 38.61  |
| L151F      | 49.27 | L123       | 40.11 | L126 | 42.29  |
| E226V      | 47.06 | E198       | 45.37 | A201 | 23.36  |
| V185I      | 46.49 | V157       | 43.1  | V160 | 42.26  |
| I295T      | 45.37 | I267       | 40.87 | M271 | 28.97  |
| R138Q      | 45.19 | R110       | 45.78 | R113 | 48.99  |
| E218K      | 43.6  | E190       | 47.32 | K193 | silent |
| R145Q      | 43.23 | R117       | 35.8  | K120 | 35.89  |
| G260D      | 42.44 | G232       | 30.17 | G236 | 28.32  |
| I210L      | 41.28 | I182       | 45.41 | I185 | 42.74  |
| G241E      | 41.18 | G214       | 43.79 | G217 | 46.98  |
| K331E      | 41.12 | K303       | 31.73 | K305 | 33.07  |
| R288C      | 40.26 | R260       | 40.52 | G264 | 36.02  |
| G177R      | 39.61 | G149       | 19.15 | K152 | 6.45   |
| G177E      | 36.98 | G149       | 15.19 | K152 | 16.45  |
| P160S      | 34.89 | P132       | 44.31 | P135 | 30.73  |
| D263N      | 32.18 | D235       | 29.84 | D239 | 30.63  |
| K188E      | 31.61 | K160       | 36.83 | F163 | 44.92  |
| I131 V     | 31.27 | I103       | 30.58 | v106 | silent |
| R343Q      | 31.2  | R315       | 29.99 | N317 | 34.2   |
| R5H        | 30.43 | R5         | 32.84 | R5   | 31.85  |
| F167L      | 29.04 | F139       | 26.69 | I142 | 21.39  |
| R60Q       | 28.58 | R60        | 11.6  | K63  | 20.56  |
| P317H      | 28.17 | P289       | 23.41 | P293 | 19.03  |
| V195I      | 25.96 | V167       | 28.52 | V170 | 21.88  |
| K335N      | 22.74 | K307       | 14.64 | K309 | 12.32  |
| S39Y       | 21.15 | S39        | 7.12  | S39  | 25.63  |
| K117R      | 20.25 | K89        | 16.32 | R92  | silent |
| S39C       | 19.9  | S39        | 8.99  | S39  | 22.42  |
| M261I      | 19.27 | M233       | 17.78 | E237 | 52.33  |
| D44N       | 18.5  | D44        | 14.08 | D45  | 25.6   |
| A328V      | 15.09 | A300       | 18.79 | S302 | 14.09  |
| Q222K      | 12.07 | Q194       | 15.17 | D197 | 21.22  |
| S198N      | 12.04 | S170       | 7.15  | T173 | 11.4   |
| R10K       | 11.05 | R10        | 6.07  | C10  | 28.82  |
| D128E      | 10.16 | D100       | 5.88  | E103 | silent |
| Q229H      | 9.82  | Q201       | 9.57  | Q204 | 8.98   |
| A250S      | 9.4   | A222       | 7.71  | R226 | 9.91   |
| S121R      | 8.49  | S93        | 2.7   | K96  | 0.44   |
| Q57K       | 7.49  | Q57        | 2.51  | N60  | 4.22   |
| L179M      | 4.74  | L151       | 4.64  | I154 | 5.71   |
| S121N      | 3.49  | S93        | 0.24  | K96  | 1.63   |
| P20Q       | 2.86  | P20        | 1.15  | P20  | 1.06   |

**ASCC1 Supplemental Table S11.** Table of Variants of Unknown Significance (VUS). VUS are listed based on human and *Alvinella* sequences, with their respective Evolutionary Action (EA) scores, a prediction on severity level. Red to green coloring is based on predicted severity to no impact, respectively.

## ASCC1 Supplemental Fig S1

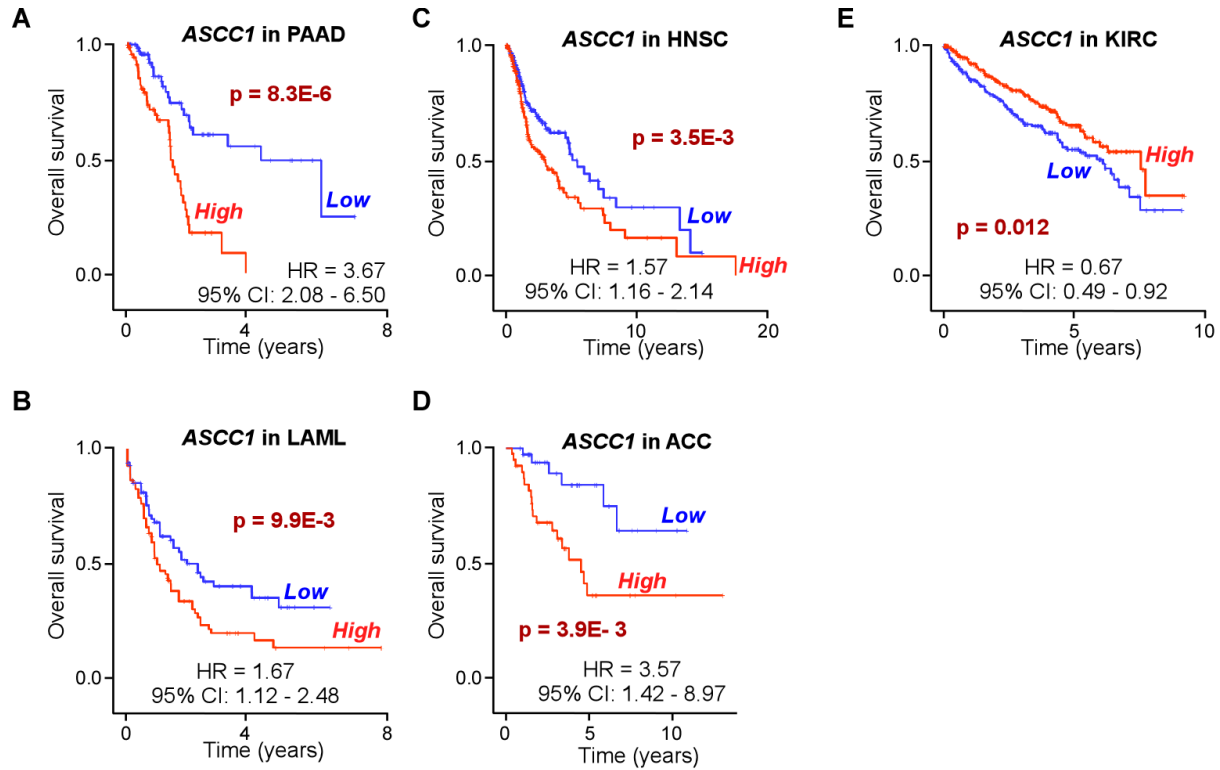

**Supplemental Figure S1** . Kaplan-Meier survival curves in TCGA tumor types in which patients with High (above mean) versus Low (below mean) ASCC1 mRNA levels displayed significant differences in survival. P-values from log-rank tests; HR, hazard ratios; CI, confidence intervals for HR. A) PAAD, pancreatic adenocarcinoma. B) LAML, acute myeloid leukemia. C) HNSC, head-neck squamous cell carcinoma. D) ACC, adrenocortical carcinoma. E) KIRC, kidney renal clear cell carcinoma.

## ASCC1 Supplemental Fig S2

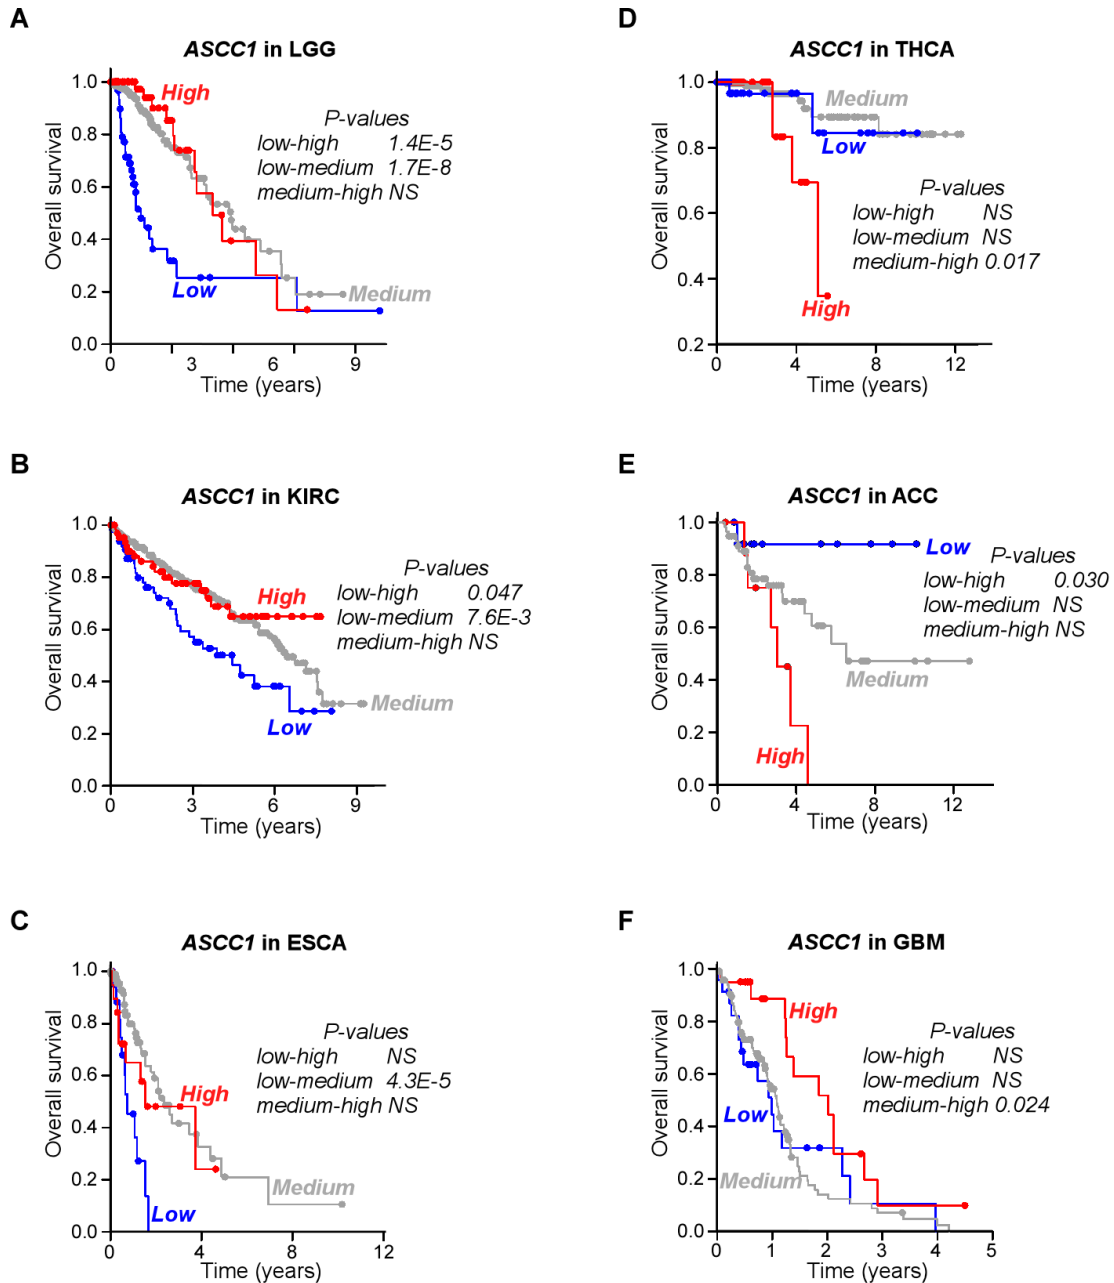

**Supplemental Figure S2 .** Kaplan-Meier survival curves in TCGA tumor types in which patients with High (above mean+1SD), versus Low (below mean-1SD), versus Medium (between mean-1SD and mean+1SD) ASCC1 mRNA levels displayed significant differences in survival. P-values from Holm-Sidak corrected log-rank tests. A) LGG, low grade glioma .B) KIRC, kidney renal clear cell carcinoma. C) ESCA, esophageal carcinoma. D) THCA, thyroid cancer. E) ACC, adrenocortical carcinoma. F) GBM, glioblastoma.

## ASCC1 Supplemental Fig S3

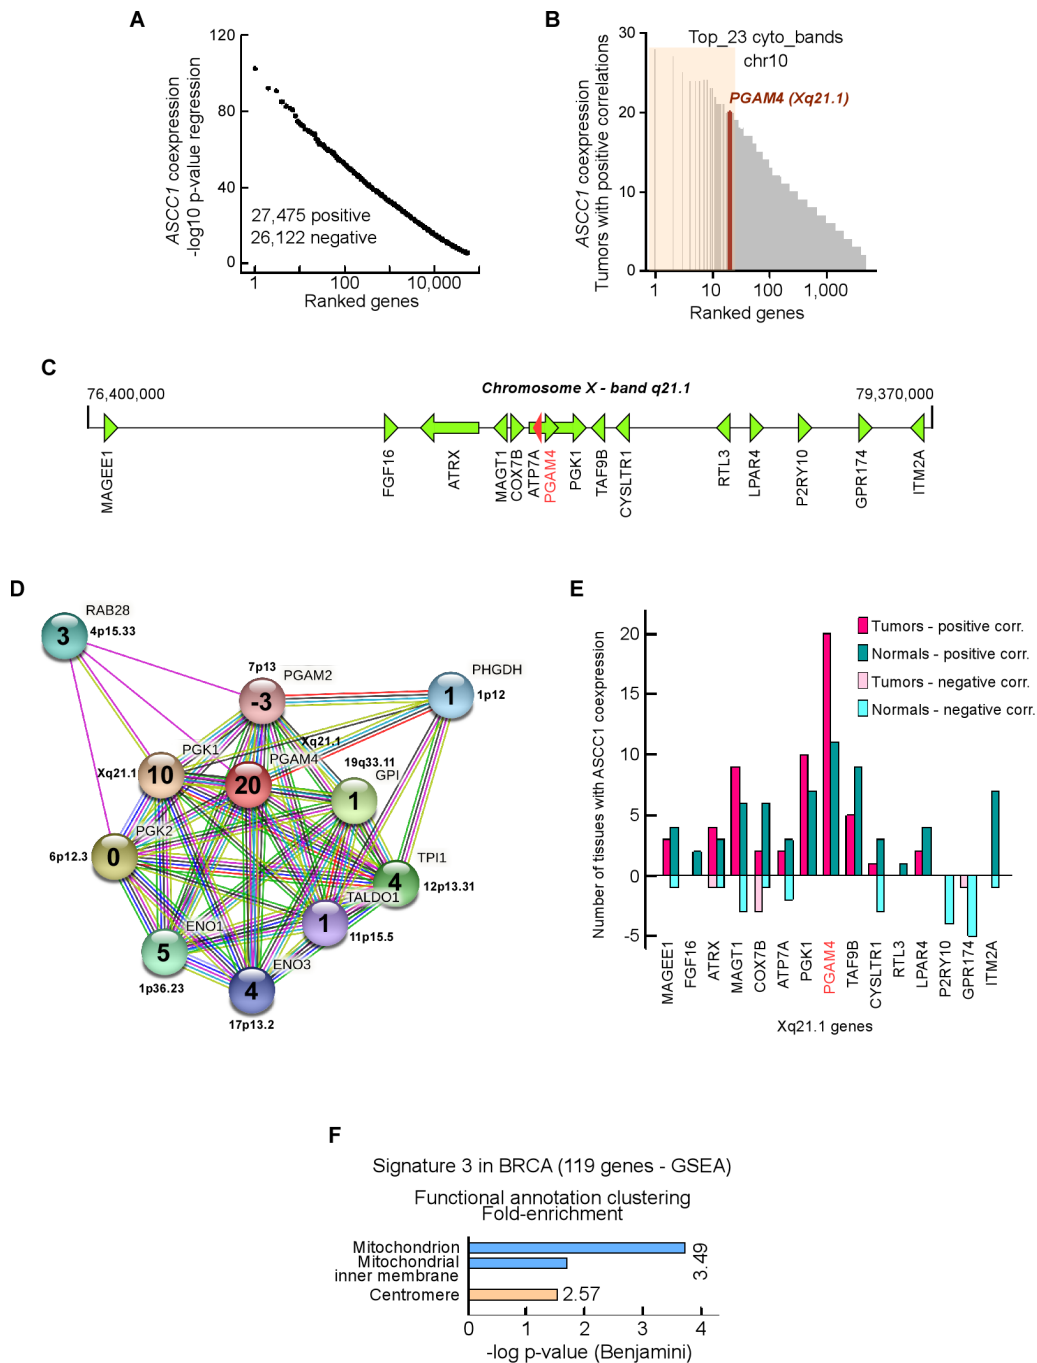

**Supplemental Figure S3 .** *ASCC1* is coexpressed with genes on chromosome Xq21.1. A-B) *ASCC1* coexpression. A, Ranked p-values (threshold set at a Bonferroni-corrected value of  $2.5 \times 10^{-6}$ ) for regression coefficients between *ASCC1* and all other genes in 33 tumor types (>660,000 regression total). B, Ranked number of tumor types in which positive correlations in tumors were observed. *Orange highlight*, the top 23 genes were located on chromosome 10, where *ASCC1* resides, expect *PGAM4* (*maroon*). C) Cartoon of transcriptional units on chromosome Xq21.1 flanking *PGAM4*. D) High-confidence protein-protein interaction (PPI) network for *PGAM4*. Numbers indicate the number of tumors with positive correlation between *ASCC1* and the test protein-coding gene was found. *Lines*, number of algorithms or experimental methods supporting a PPI. E) Number of tissues where significant co-expression was observed between *ASCC1* and genes flanking *PGAM4* for both tumors and matched controls. Negative values indicate negative correlation. F) GSEA (gene set enrichment analysis) of all genes found to be significantly ( $p < 0.002$ ; Fisher's exact test) associated with Signature 3 (but not Signatures 3 + 13) in BRCA when expressed at high levels (i.e. above the mean). *x-axis*, p-values from Benjamini-corrected Fisher's exact tests; *y-axis*, gene ontology terms. *Fold-enrichment*, fold-enrichment relative to random occurrence for clusters of related gene ontology terms.

# Supplemental Fig S4

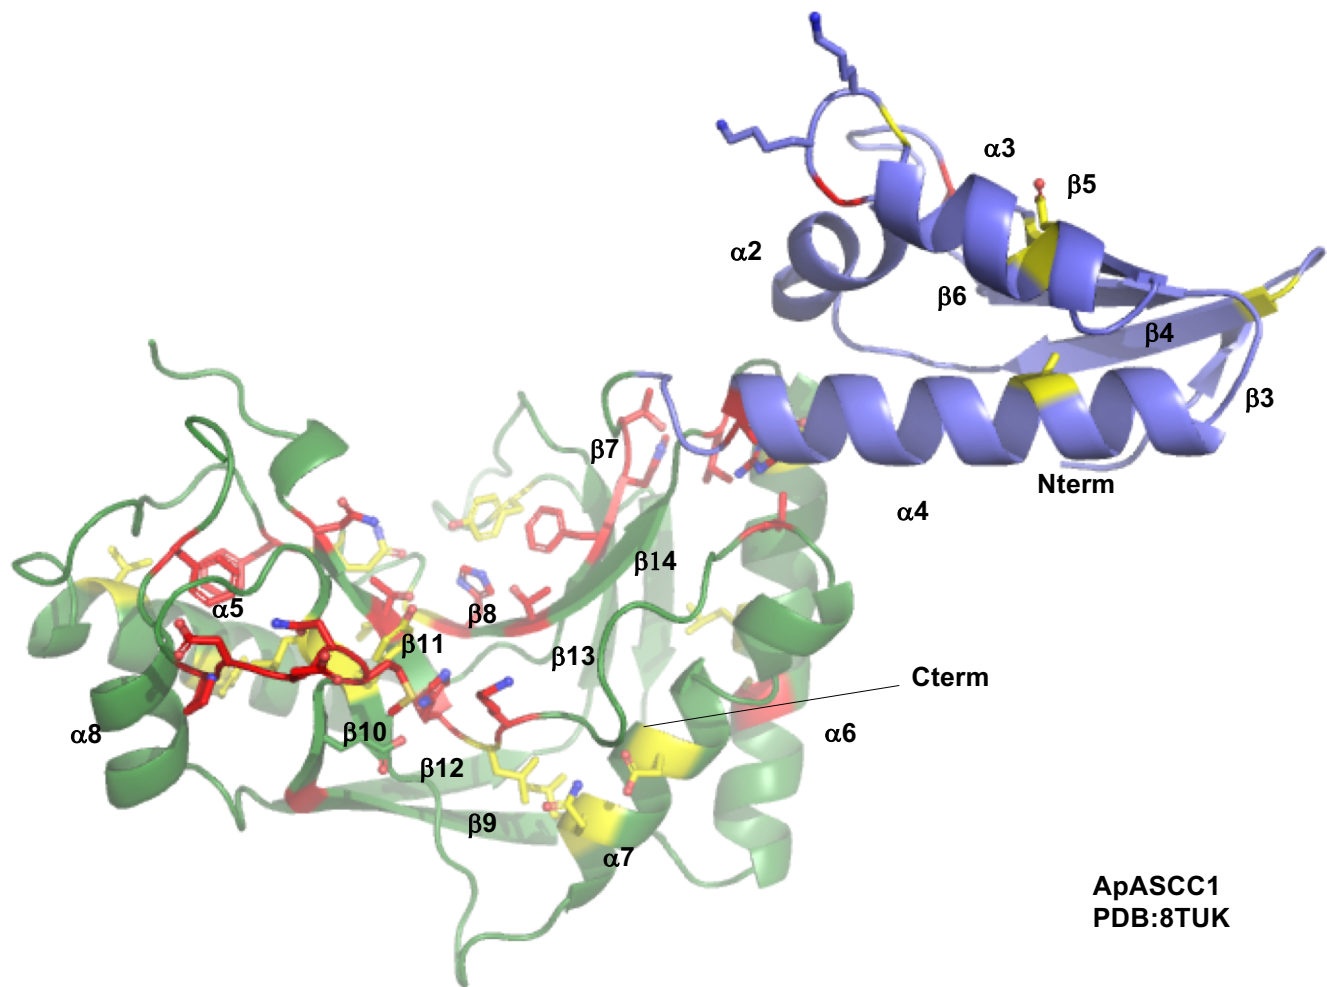

**Supplementary Figure S4.** Secondary structure numbering of  $\Delta 40$  ApASCC1 corresponding to Fig. 3.



Supplemental Fig S5

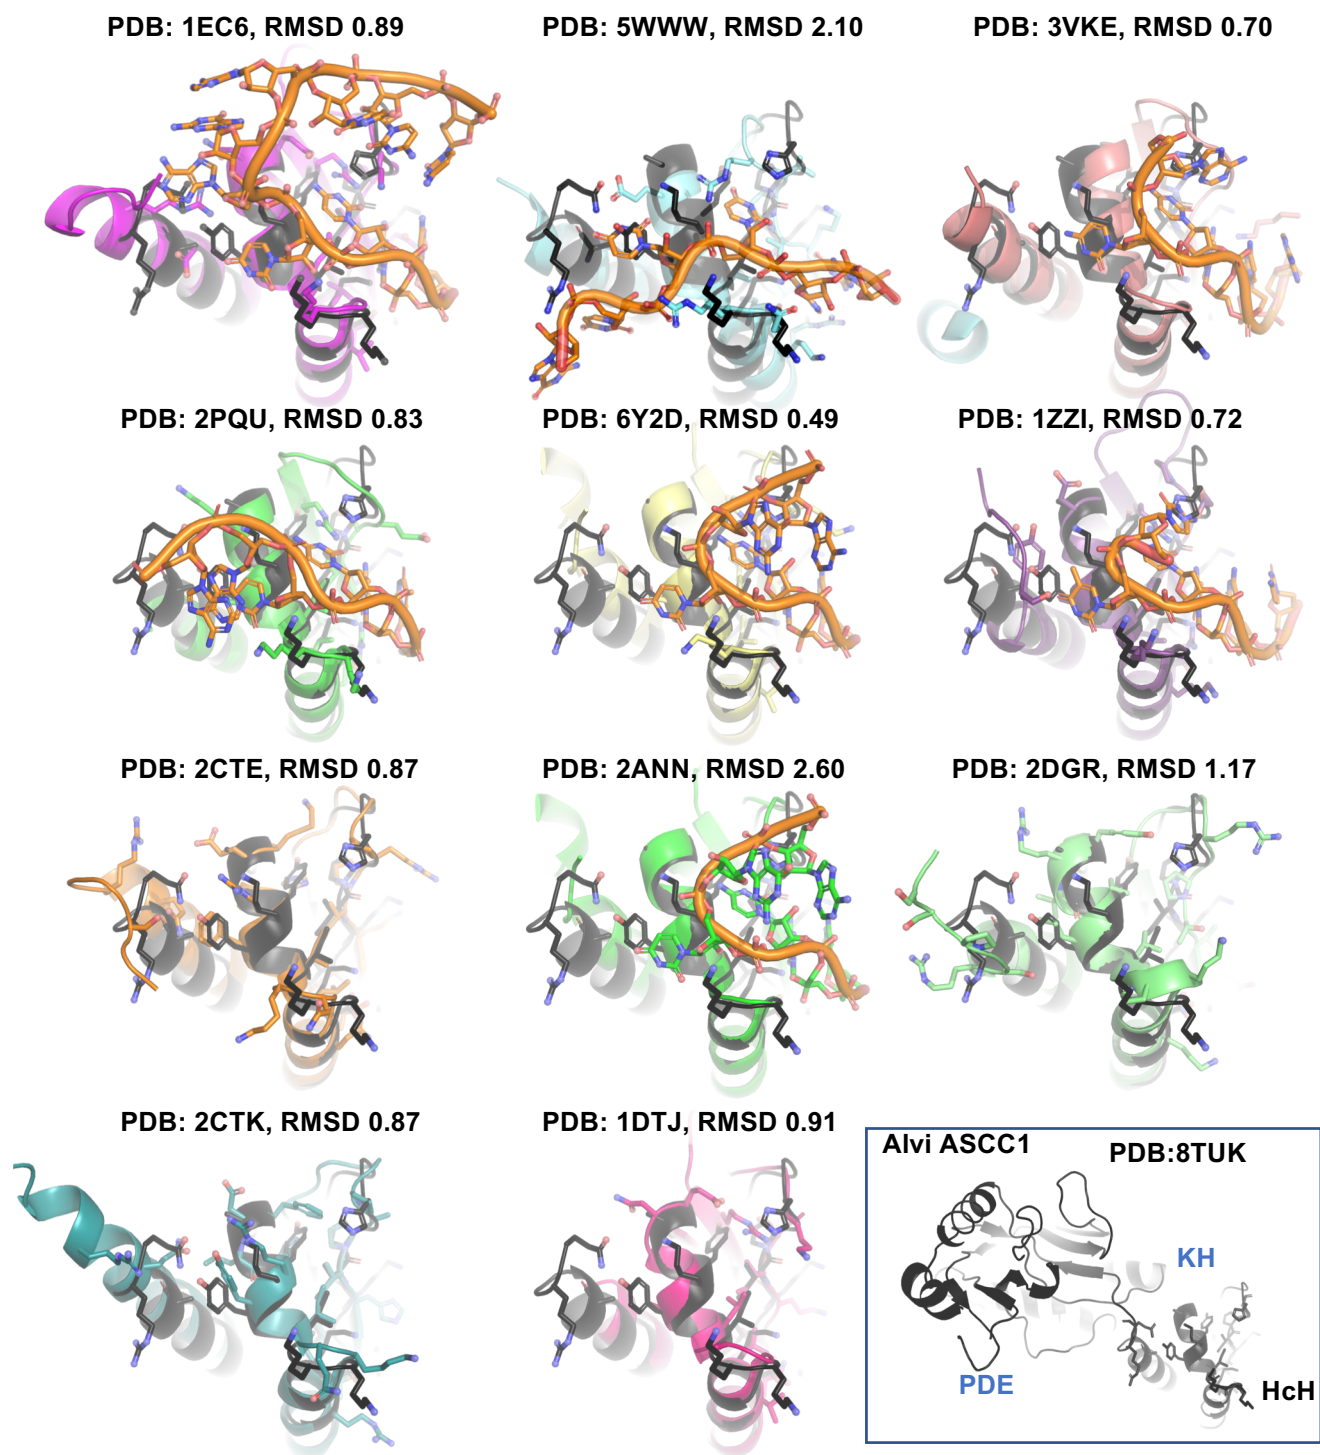

**Supplemental Figure S5.** Overlay of top DALI and Foldseek KH domains onto ApASCC1 KH domain (black). Orientation is such that the highly conserved HcH is at the bottom and the PDE domain would be on the left side, as shown by inset of a zoomed out ASCC1. KH domains are known as RNA-binding domains. With nucleic acids colored orange, the nucleic acid path can vary from KH domain to KH domain. Varying steric clash between Alvi ASCC1 KH domain and nucleic acid bases suggest ASCC1 may bind RNA distinctly.

## Supplemental Figure S6

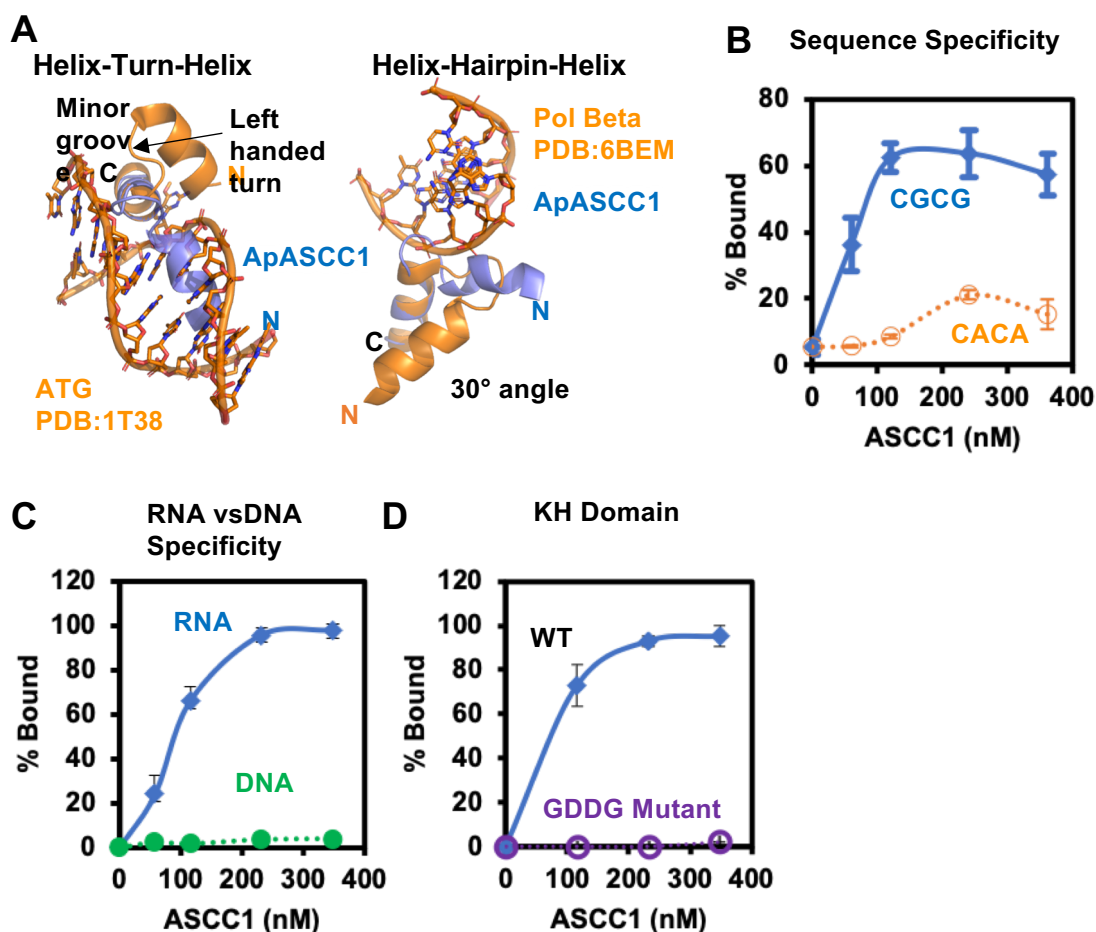

**Supplemental Figure S6.** KH Domain Structure and ASCC1 RNA binding specificity.

A) Representative Helix-Turn-Helix motif in ATG or a representative Helix-Hairpin-Helix motif in Pol Beta overlaid onto the C-terminal helices of ApASCC1 highlights their structural and recognition differences from the Helix-Clasp-Helix motif

B) Quantitation of EMSA showing HsASCC1 binding of RNA CGCG-containing sequence vs CACA-containing sequence, in Figure 4C. Dose-response curve were generated by plotting the percentage of bound RNA against total radiolabeled RNA. Error bars show  $\pm$  standard deviation from the mean; n = 3 independent experiments.

C) Quantitation of EMSA showing HsASCC1 binding of RNA versus DNA, in Figure 4D. Dose-response curve were generated by plotting the percentage of bound RNA/DNA against total radiolabeled RNA/DNA. Error bars show  $\pm$  standard deviation from the mean; n = 3 independent experiments.

D) Quantitation of EMSA showing wild-type (WT) vs mutant GDDG HsASCC1 binding of CGCG-containing RNA, in Figure 4E. Dose-response curve were generated by plotting the percentage of bound RNA against total radiolabeled RNA. Error bars show  $\pm$  standard deviation from the mean; n = 3 independent experiments.

## ASCC1 Supplemental Fig S7

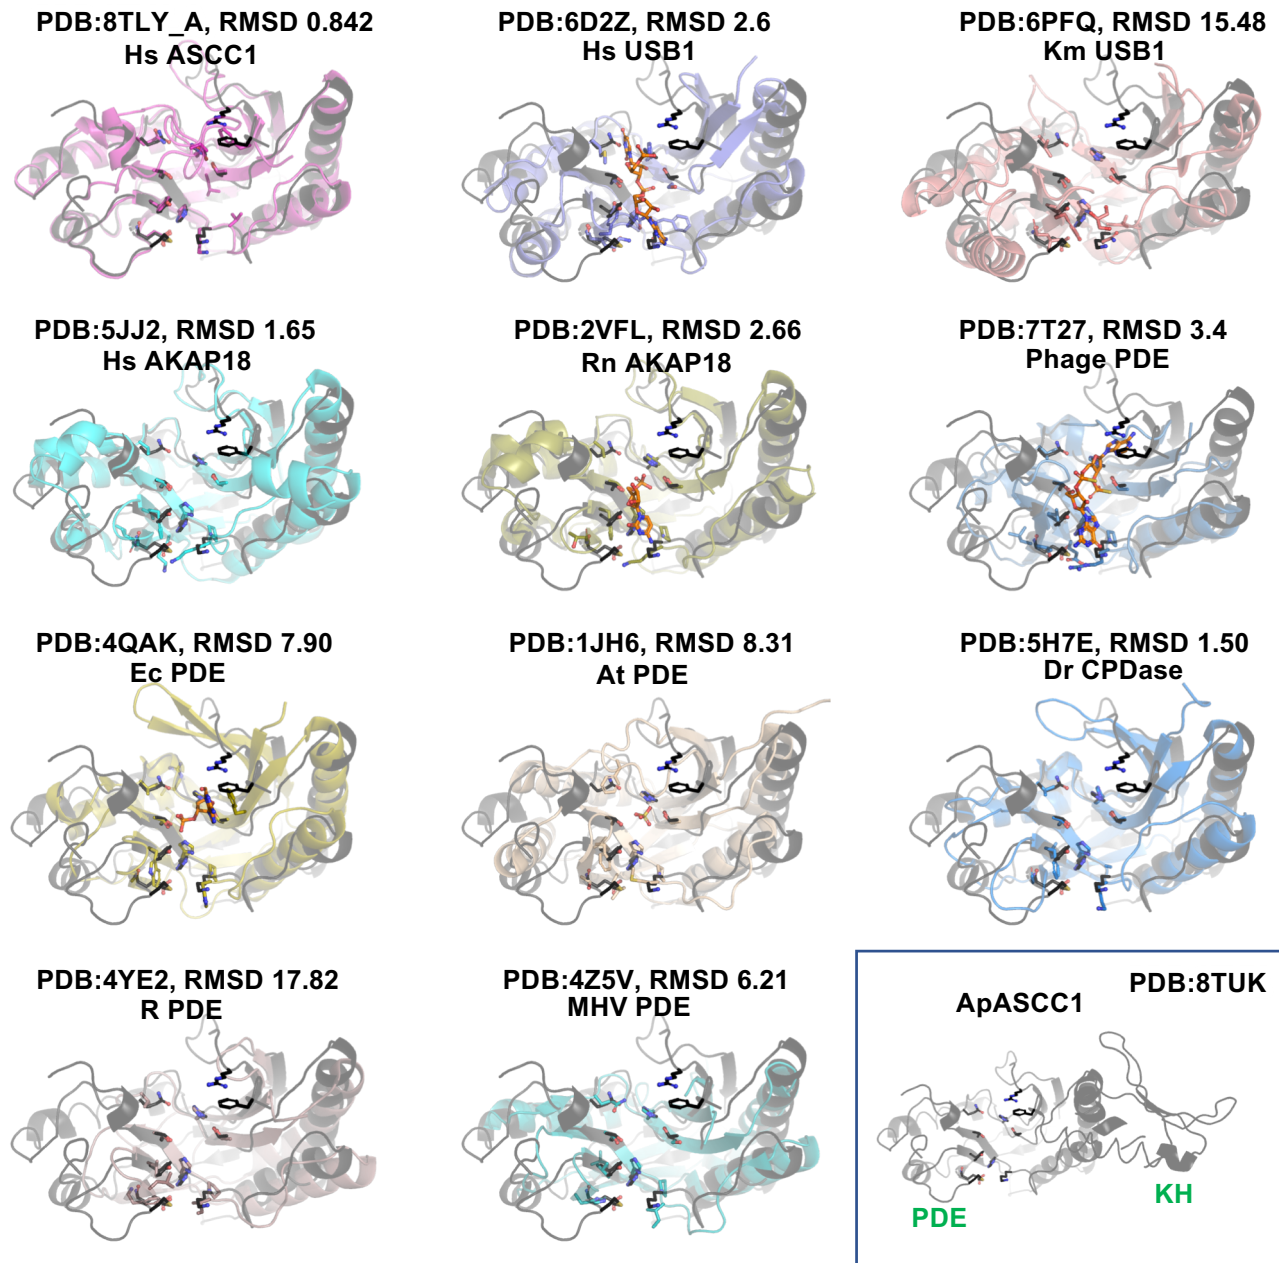

**Supplemental Figure S7.** Overlay of 2HXT domains onto ApASCC1 PDE domain (black). Orientation is such that the HXT motifs are facing up and KH domain would be on the right side, as shown by inset of a zoomed out ASCC1.

## ASCC1 Supplemental Fig S8

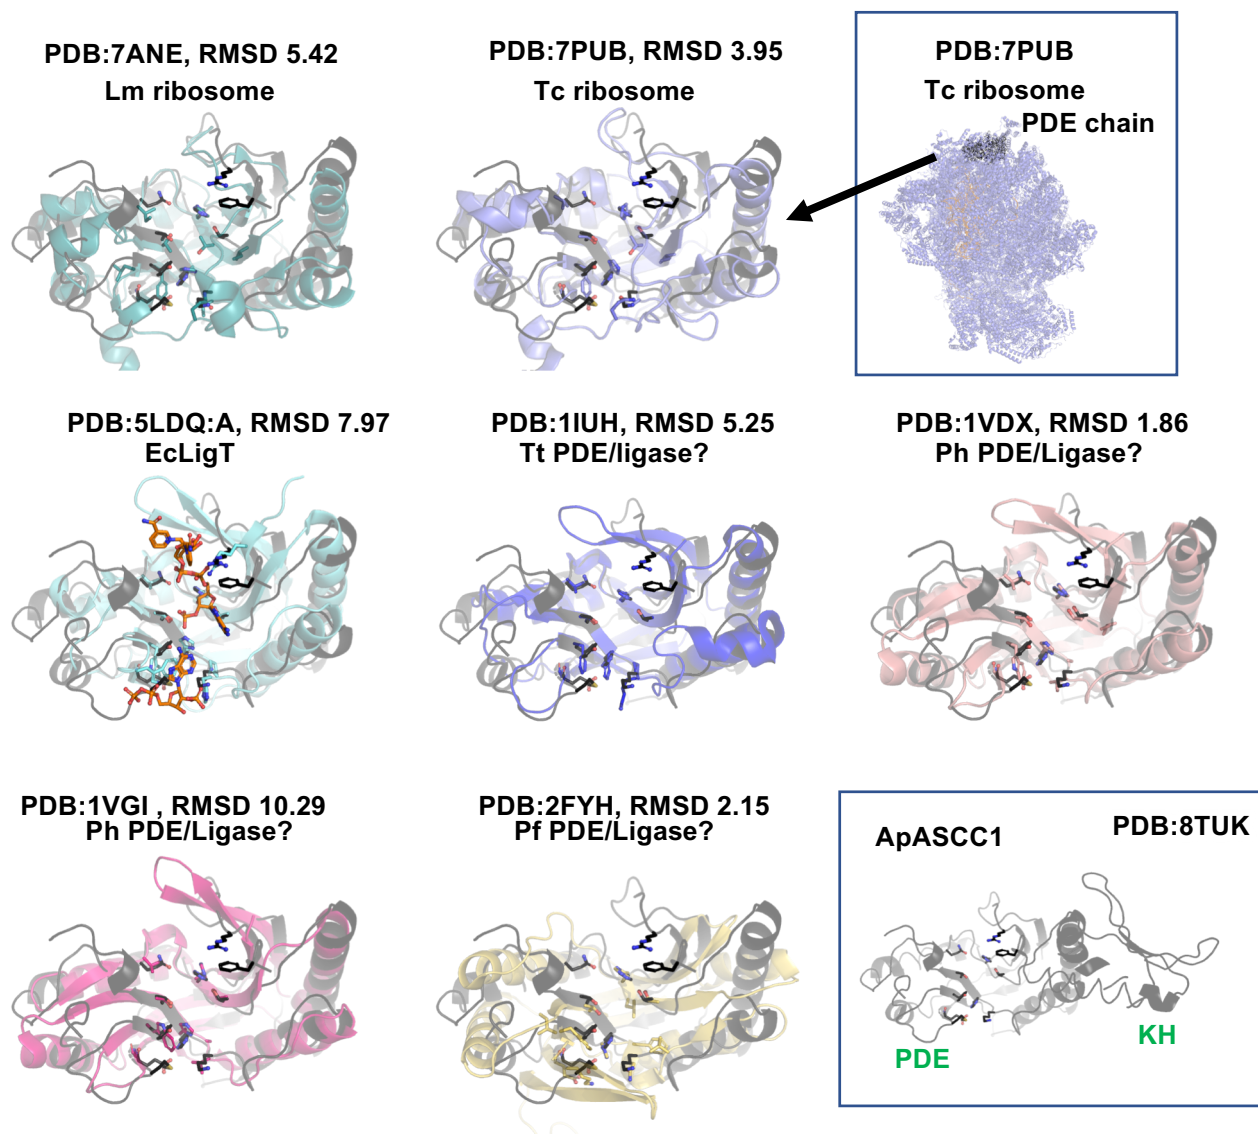

**Supplemental Figure S8.** Overlay of ligase-associated 2HXT domains onto ApASCC1 PDE domain (black). Orientation is such that the HXT motifs are facing up and KH domain would be on the right side, as shown by inset of a zoomed out ASCC1.

## ASCC1 Supplemental Fig S9

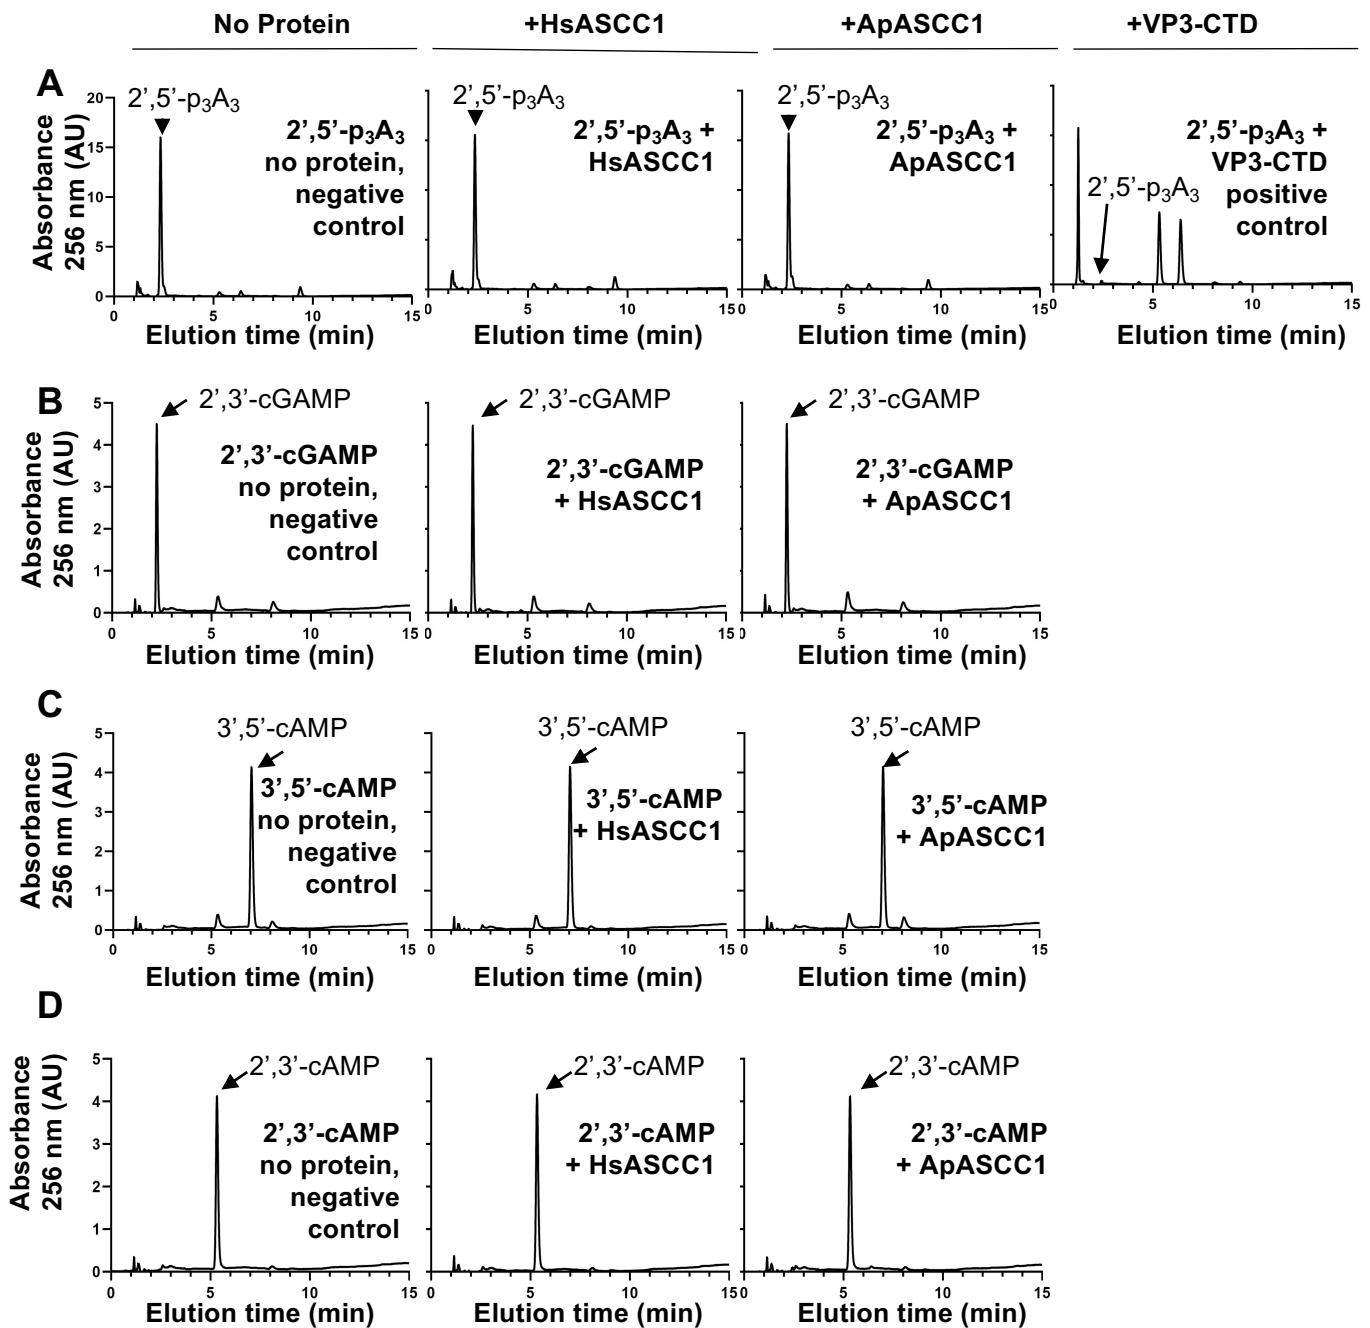

**Supplemental Fig S9.** ASCC1 had no detectable activity against 2',5'-p<sub>3</sub>A<sub>3</sub>, 2',3'-cGAMP, 3',5'-cAMP, or 2',3'-cAMP

Ten μM of A) 2',5'-p<sub>3</sub>A<sub>3</sub>, B) 2',3'-cGAMP, C) 3',5'-cAMP, or D) 2',3'-cAMP was incubated with 1 μM of human- or alvi-ASCC1 for 30 min at 30°C. Substrate without enzyme incubated under similar condition were used as un-degraded, negative control. Percent substrate remaining was calculated by measuring the area under the peaks in the HPLC chromatograms. As a positive control, RVA VP3-CTD degraded 2',5'-p<sub>3</sub>A<sub>3</sub> (<2 % of substrate remaining) under the similar conditions. Shown are representative HPLC chromatograms. These experiments were performed in triplicate with similar results.

## ASCC1 Supplemental Fig S10

A

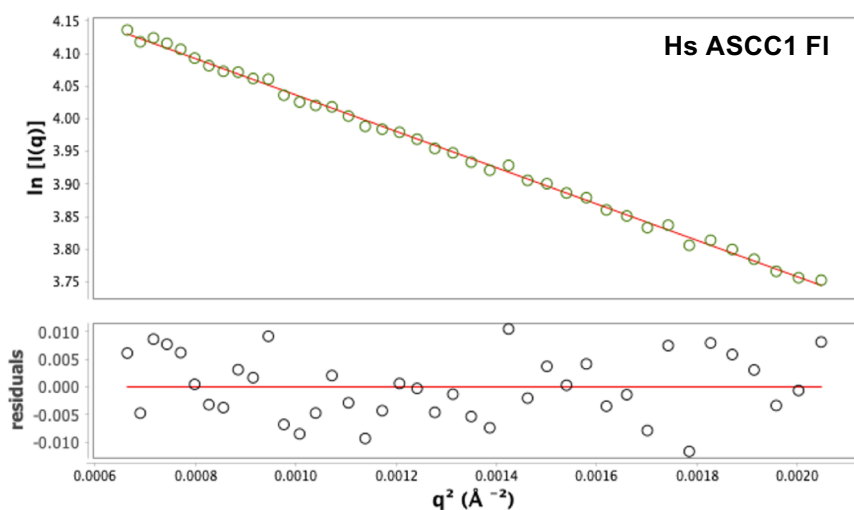

B

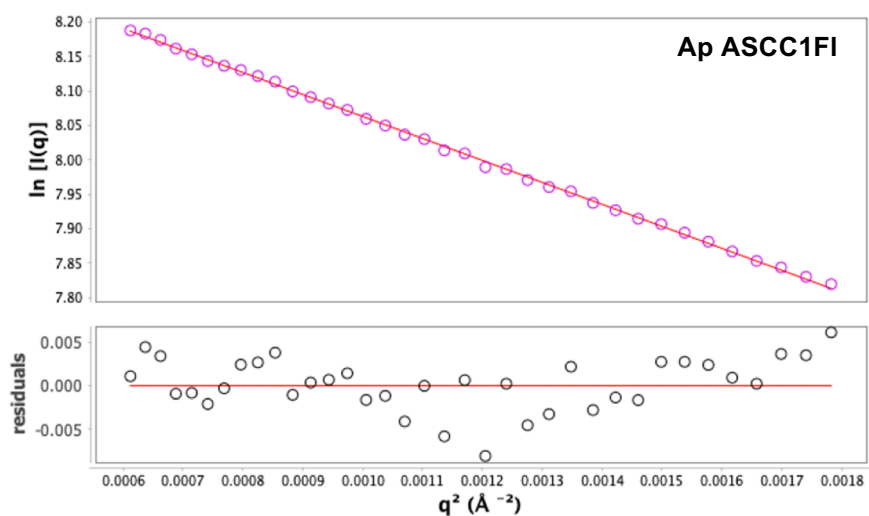

C

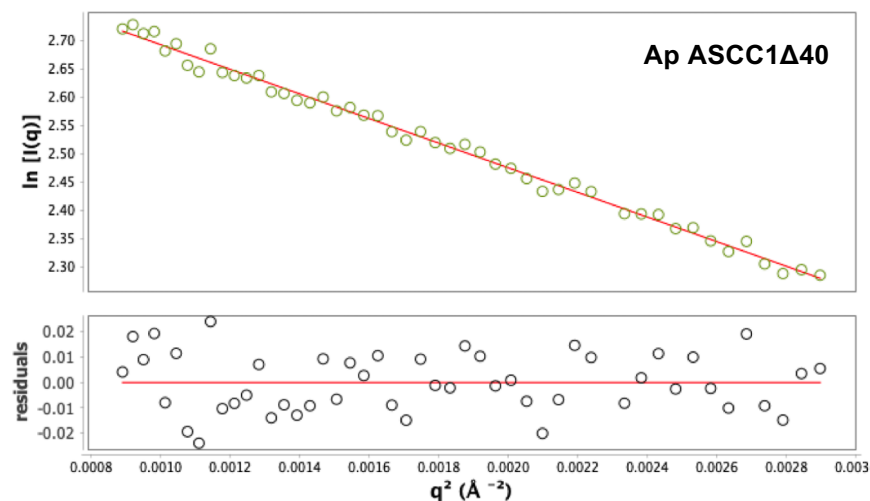

**Supplemental Figure S10.** Guinier analysis of SAXS data A. Hs ASCC1 FI, B. Ap ASCC1 FI and C. Ap ASCC1Δ 40 shows that the Guinier regions are linear, indicating that the protein samples had no significant amounts of large aggregation.

## ASCC1 Supplemental Fig S11

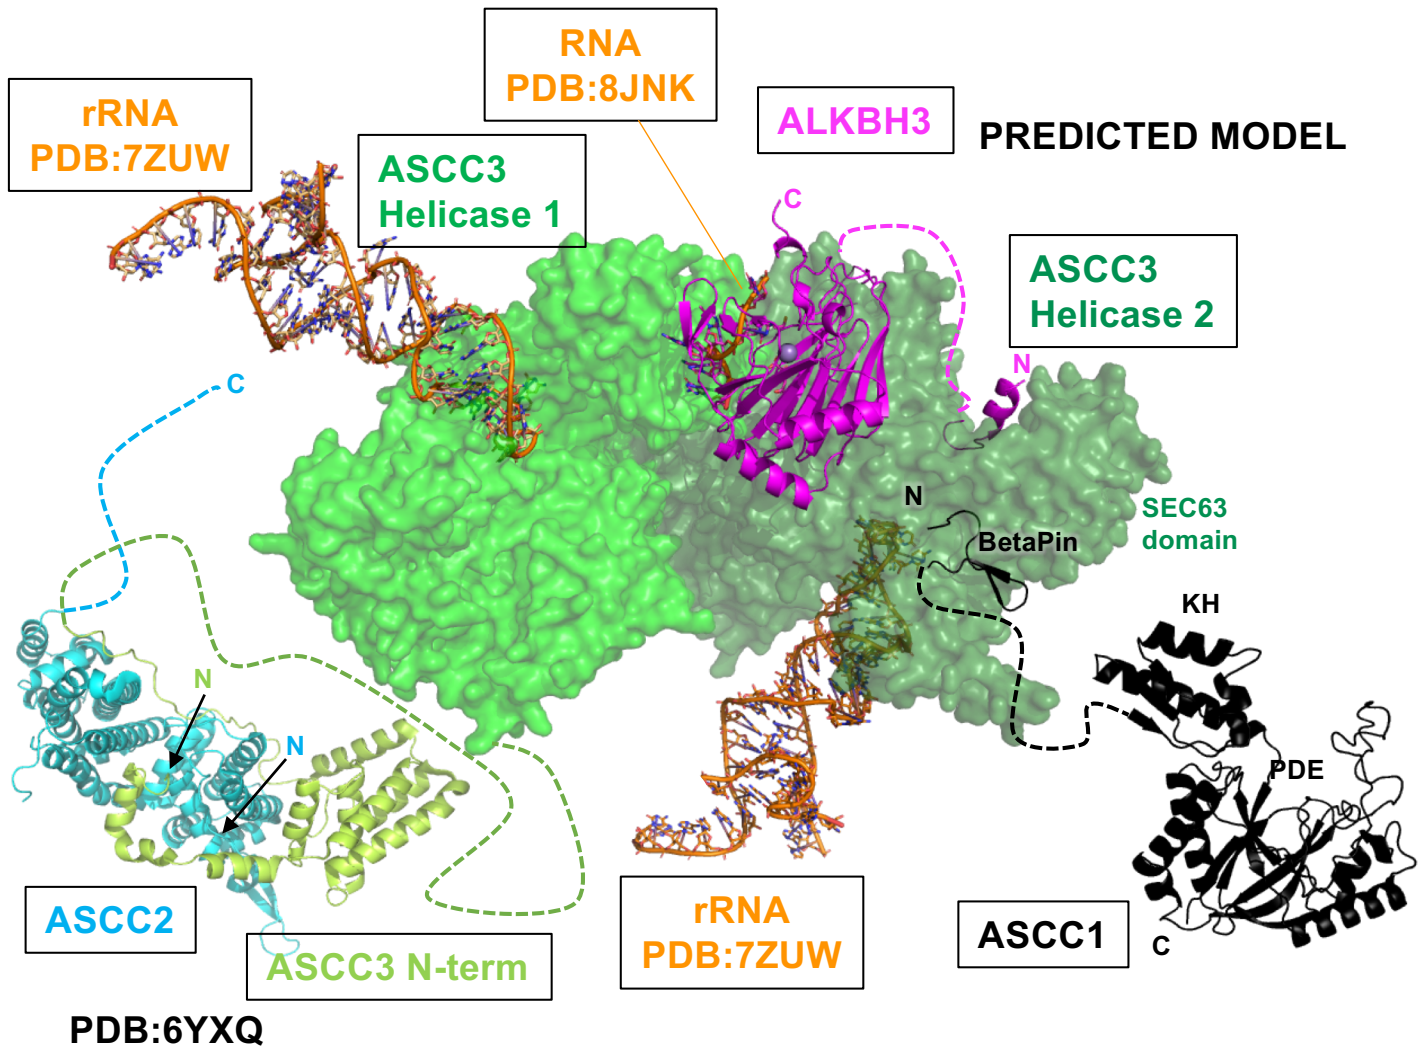

**Supplemental Figure S11.** Model of Alkylation Response complex with ALKBH3, ASCC1, ASCC2, and ASCC3 suggests that ASCC1 and ASCC2 are tethered to ASCC3, while ALKBH3 is predicted to have two ASCC3 interfaces, a helix at the N-terminus and the catalytic domain. Suggestive to co-regulation, the ASCC1 and ALKBH3 tether on opposite sides of the SEC63 domain of the ASCC3 second helicase.

Atomic model was assembled based on pairwise AlphaFold-Multimer runs, HsASCC2/ASCC3 structure (PDB:6YXQ), RNA in complex with ALKBH3 (PDB:8JNK) and rRNA (PDB:7ZUW) from the yeast stalled ribosome structure with RQT (ASCC2, ASCC3, and TRIP4). Predicted interfaces modeled as cartoon are those that reproducibly occurred in all 5 predictions. rRNA position on ASCC3 helicase 1 was based on the yeast structure. Second rRNA position came from overlay of helicase 1 on helicase 2. Dotted lines represent regions with low confidence in the prediction. The two helicase domains were shown for clarity as semi-transparent surface, to highlight interactions with ALKBH3 and ASCC1. Pairwise runs between ALKBH3, ASCC1, and ASCC2 did not produce high confidence interfaces. Surprisingly, human ASCC2 and yeast ASCC2 are not well-conserved, and the human proteins are not predicted in the same interface as shown for the yeast structure (PDB:7ZUW).
